# Supplementary material for: Host–guest complexation of pillar[6]arenes towards neutral nitrile guests
Source: Royal Society of Chemistry journal article supplement (doi:10.1039/c5cc06801k), 2015-01-01
Supplement: c5cc06801k1.pdf [file c5cc06801k1.pdf]

## Electronic supplementary information

# Host-guest Complexation of Pillar[6]arene towards Neutral Nitrile Guests

Mao-Sen Yuan,<sup>a</sup> Huanqing Chen,<sup>b</sup> Xianchao Du,<sup>a</sup> Jian Li,<sup>b</sup> Jinyi Wang,<sup>\*a</sup> Xueshun Jia<sup>\*b,c</sup> and

Chunju Li<sup>\*b</sup>

<sup>a</sup> College of Science, Northwest A&F University, Yangling, Shaanxi 712100, P. R. China.  
E-mail: jywang@nwsuaf.edu.cn.

<sup>b</sup> Department of Chemistry, Shanghai University, Shanghai 200444, P. R. China. E-mail:  
cjli@shu.edu.cn, xsjia@mail.shu.edu.cn.

<sup>c</sup> State Key Laboratory of Applied Organic Chemistry, Lanzhou University, Lanzhou, 730000,  
P.R. China

## Contents

|                                                                                |    |
|--------------------------------------------------------------------------------|----|
| Materials and methods.                                                         | S2 |
| Copies of <sup>1</sup> H NMR and <sup>13</sup> C NMR spectra of EtP6A host.    | S3 |
| <sup>1</sup> H NMR spectra of guests in the absence and presence of EtP6A.     | S4 |
| UV-vis spectra.                                                                | S6 |
| Crystal structure of <b>5</b> ⊂EtP6A complex and the C–H···N(O, π) parameters. | S7 |
| Determination of the association constants.                                    | S8 |
| References.                                                                    | S9 |

## Materials and methods.

All of the guests were commercially available and used as received. EtP6A<sup>[S1]</sup> host was prepared according to literature procedures. <sup>1</sup>H NMR, <sup>13</sup>C NMR and 2D NOESY spectra were recorded on a Bruker AV500 instrument.

## X-ray crystal data of 5C-EtP6A complex.

Crystallographic data: colorless, C<sub>76</sub>H<sub>92</sub>N<sub>2</sub>O<sub>12</sub>, FW 1225.51, Monoclinic, space group P 21/n, a=11.966 (3), b=12.944 (4), c=21.641 (6),  $\alpha = 90^\circ$ ,  $\beta = 90.390 (5)^\circ$ ,  $\gamma = 90^\circ$ , V=3351.9 (16) Å<sup>3</sup>; Z=2, D<sub>c</sub>=1.214 g cm<sup>-3</sup>; T=173(2) K,  $\mu = 0.081 \text{ mm}^{-1}$ ; 12619 measured reflections, 5823 independent reflections, 412 parameters, 0 restraint, F(000)=1316, R1=0.1072, wR2 =0.2138 (all data), R1=0.0632, wR2 =0.1735 [I>2 $\sigma$ (I)], max. residual density 0.465 e·Å<sup>-3</sup>; and goodness-of-fit (F<sup>2</sup>) =1.025. CCDC 1417657.

Copy of  $^1\text{H}$  NMR and  $^{13}\text{C}$  NMR spectra of EtP6A host.

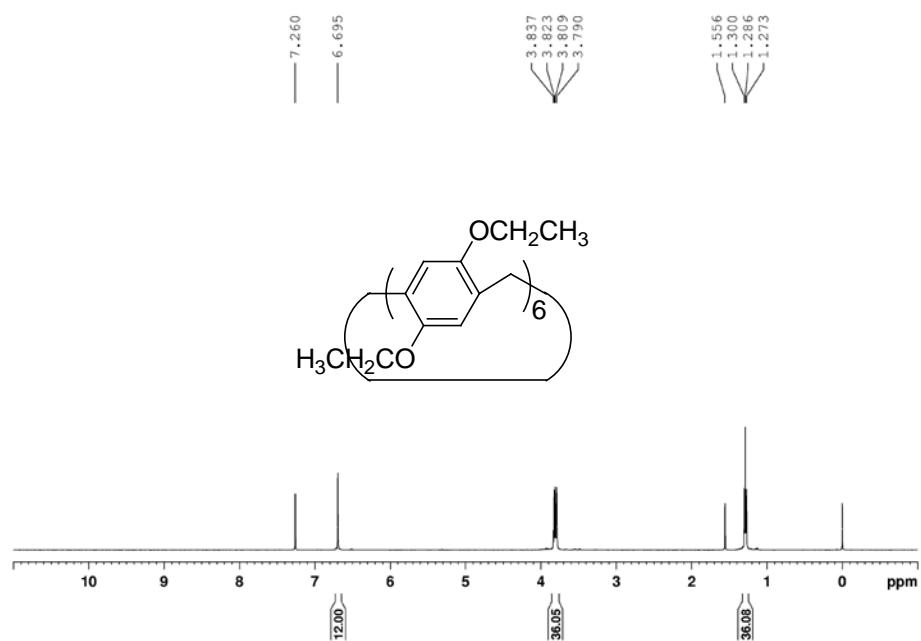

Figure S1.  $^1\text{H}$  NMR spectrum (500MHz) of EtP6A in  $\text{CDCl}_3$ .

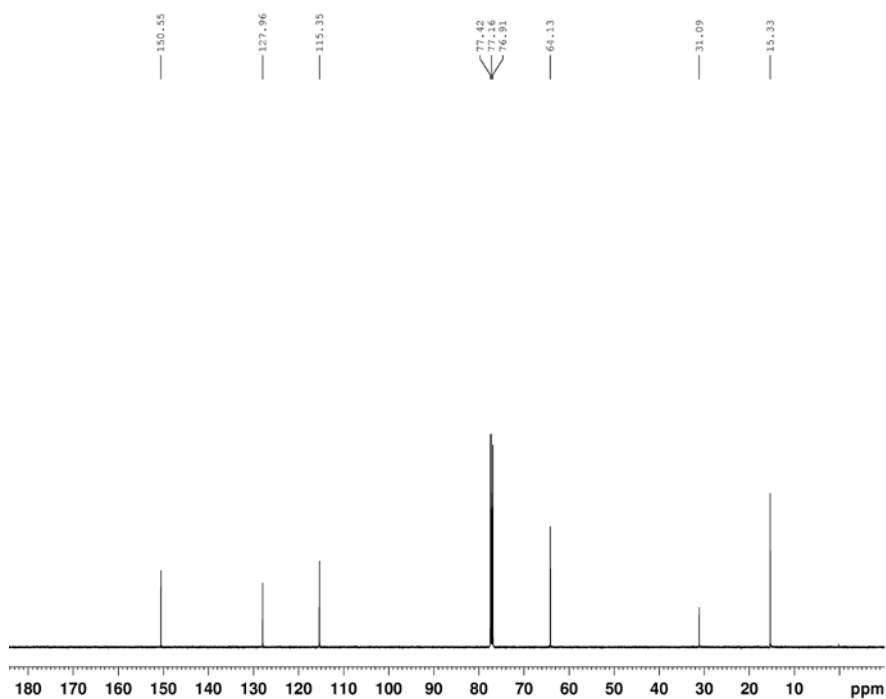

Figure S2.  $^{13}\text{C}$  NMR spectrum (125MHz) of EtP6A in  $\text{CDCl}_3$ .

**$^1\text{H}$  NMR spectra of guests in the absence and presence of EtP6A.**

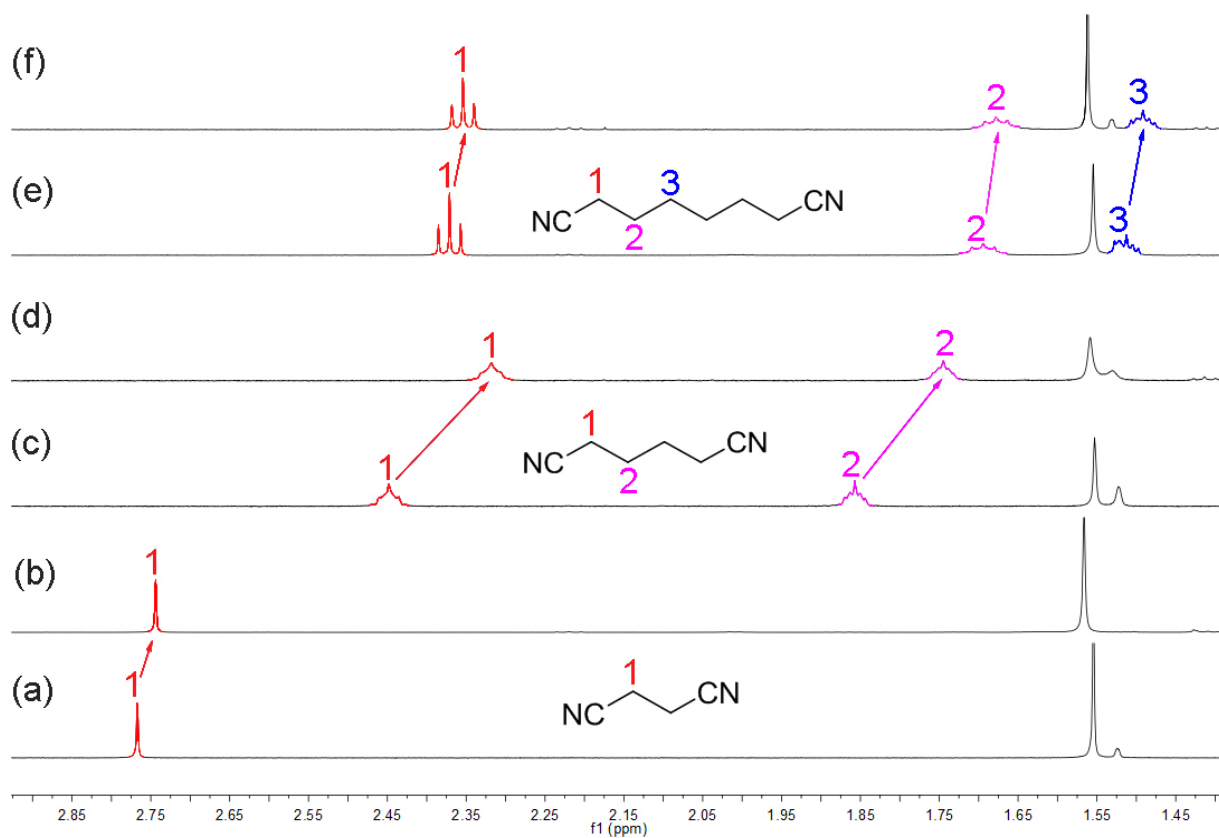

**Figure S3.**  $^1\text{H}$  NMR spectra (500 MHz) of (a) **1**, (b) **1**+EtP6A, (c) **2**, (d) **2** + EtP6A, (e) **3**, and (f) **3** + EtP6A in  $\text{CDCl}_3$  at 4.5–5.0 mM.

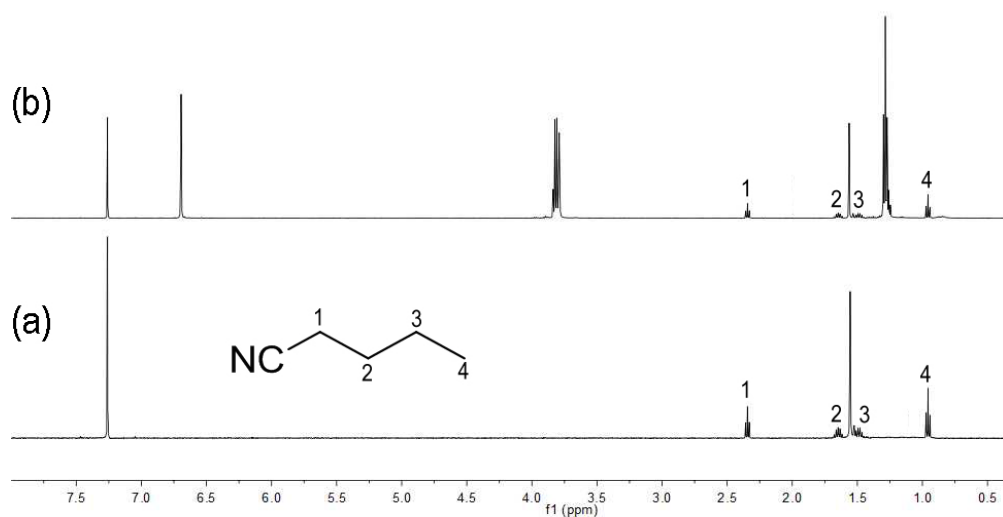

**Figure S4.**  $^1\text{H}$  NMR spectra (500 MHz) of (a) **4** and (b) **4** + EtP6A in  $\text{CDCl}_3$  at 4.4–4.7 mM.

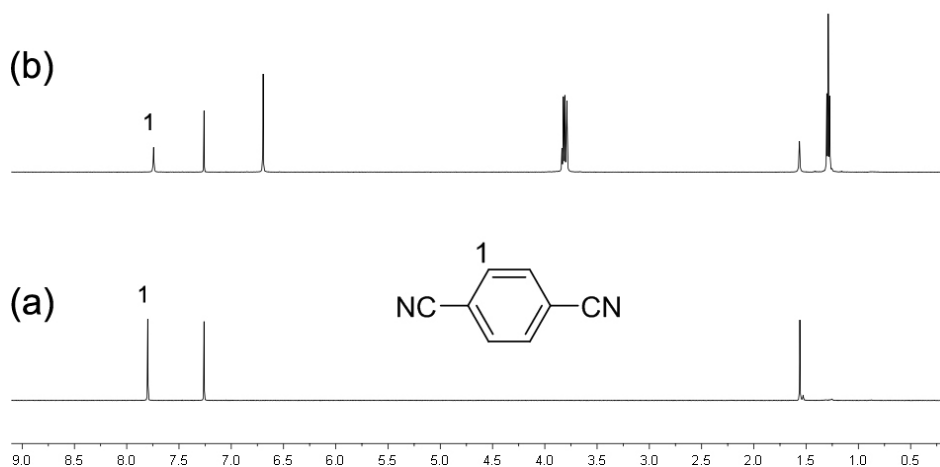

**Figure S5.**  $^1\text{H}$  NMR spectra (500 MHz, 298 K) of (a) **7** and (b) **7**+ EtP6A in  $\text{CDCl}_3$  at 4.6–5.0 mM.

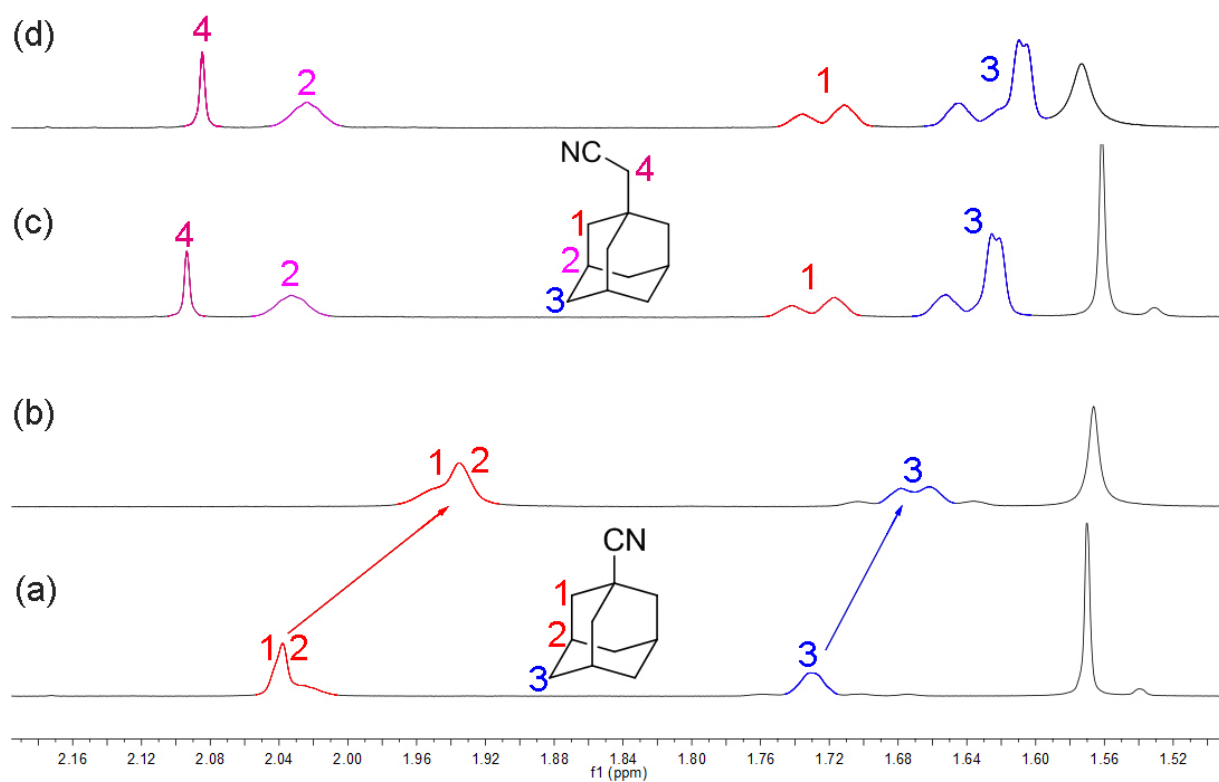

**Figure S6.**  $^1\text{H}$  NMR spectra (500 MHz) of (a) **10**, (b) **10** + EtP6A, (c) **11**, and (d) **11** + EtP6A in  $\text{CDCl}_3$  at 4.4–4.9 mM.

## UV-vis spectra.

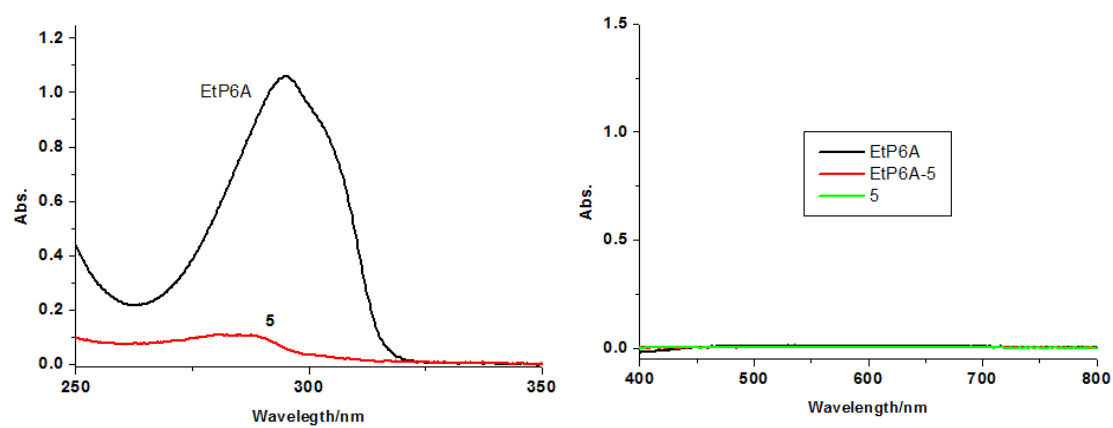

**Figure S7.** UV-vis spectra of EtP6A, guest **5**, and 1:1 mixture of EtP6A and **5** in  $\text{CHCl}_3$ . Left: The concentration is  $3.0 \times 10^{-5}$  mol/L for the left graph, and  $3.0 \times 10^{-3}$  mol/L for the right one.

**Crystal structure of 5⊂EtP6A complex and the C–H⋯N(O, π) parameters.**

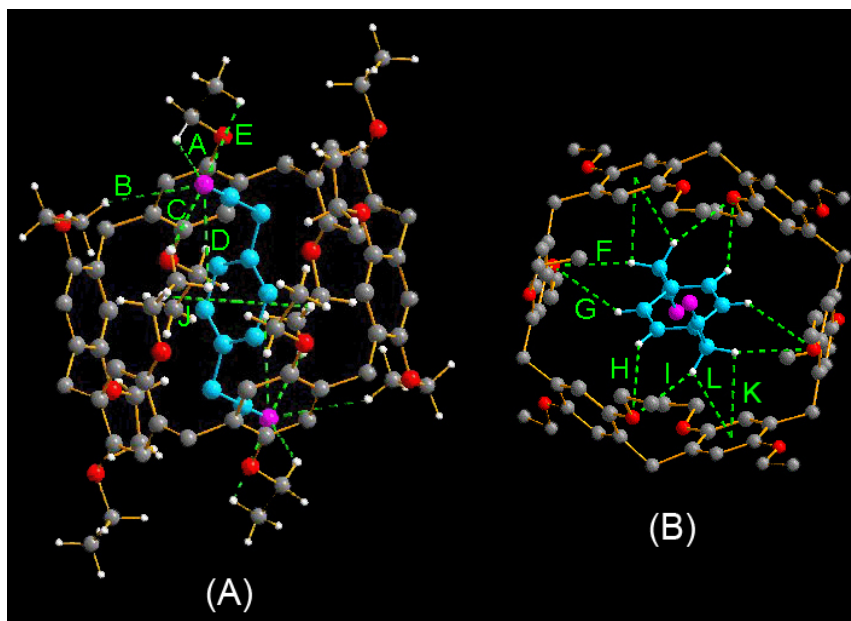

**Figure S8.** Crystal structure of the inclusion complex 5⊂EtP6A. EtP6A is gray, guest 5 is sky blue, oxygens are red, and nitrogens are pink. Dashes represent C–H⋯N(O) hydrogen bonds or C–H⋯π interactions. C–H⋯N hydrogen bonds parameters: H⋯N distances (Å), C–H⋯N angles (deg) A, 3.284, 110.620; B, 3.475, 132.178; C, 2.732, 133.608; D, 3.477, 82.125; E, 3.417, 110.620. C–H⋯O hydrogen-bond parameters: H⋯O distances (Å), C–H⋯O angles (deg) F, 2.756, 164.078; G, 3.403, 141.262; H, 3.312, 142.022; I, 2.726, 153.420. C–H⋯π parameters: H⋯ring centre distance (Å), C–H⋯ring angles (deg) J, 3.142, 146.474; K, 3.148, 98.270; L, 2.902, 114.405.

### Determination of the association constants.

To determine the association constant ( $K_a$ ), NMR titrations were done with solutions which had a constant concentration of EtP6A and varying concentrations of guest. Using the nonlinear curve-fitting method, the association constant was obtained for the host-guest combination from the following equation<sup>[S2]</sup>:

$$A = (A_\infty / [\text{EtP6A}]_0) \left( 0.5[\text{G}]_0 + 0.5([\text{EtP6A}]_0 + 1/K_a) - \left( 0.5([\text{G}]_0^2 + 2[\text{G}]_0(1/K_a - [\text{EtP6A}]_0) + (1/K_a + [\text{EtP6A}]_0)^2 \right)^{0.5} \right)$$

Where  $A$  is the chemical shift change of the aromatic protons on EtP6A host at  $[\text{G}]_0$ ,  $A_\infty$  is the chemical shift change of the aromatic protons when the host is completely complexed,  $[\text{EtP6A}]_0$  is the fixed initial concentration of the host, and  $[\text{G}]_0$  is the initial concentration of guest.

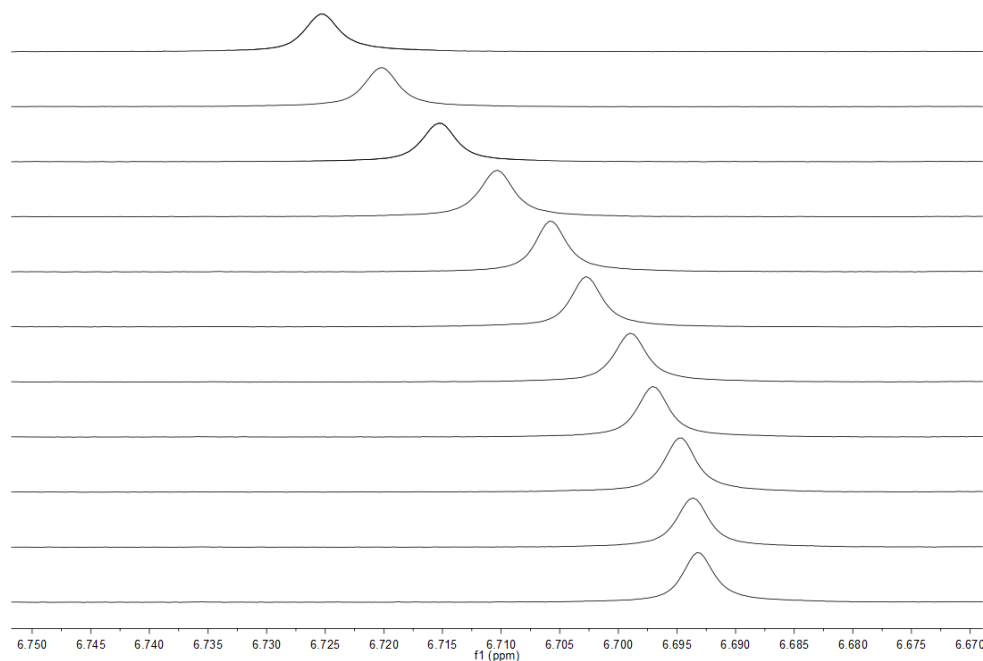

**Figure S9.** Partial  $^1\text{H}$  NMR spectra (500 MHz, in  $\text{CDCl}_3$  at 296 K) of EtP6A at a concentration of 1.01 mM upon addition of **5**. From bottom to top, the concentration of **5** was 0, 0.85, 2.5, 5.7, 8.7, 14, 19, 27, 37, 49 and 66 mM.



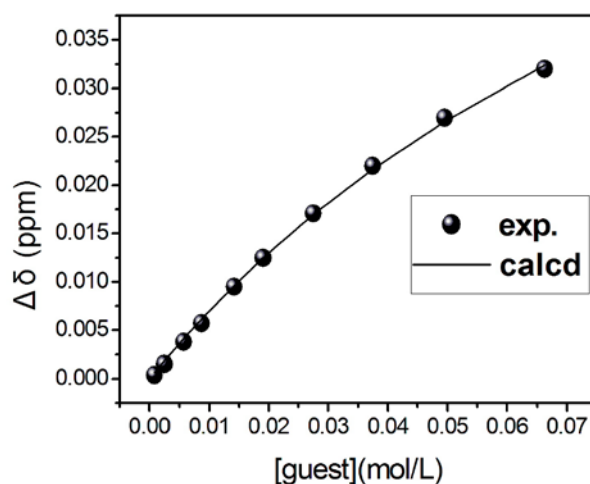

**Figure S10.** The non-linear curve-fitting (NMR titrations) for the complexation of EtP6A host (1.0 mM) with **5** in  $\text{CDCl}_3$  at 296 K. The concentration of **5** was 0.85, 2.5, 5.7, 8.7, 14, 19, 27, 37, 49 and 66 mM.

## References.

---

[S1] (a) D. Cao, Y. Kou, J. Liang, Z. Chen, L. Wang and H. Meier, *Angew. Chem., Int. Ed.*, **2009**, *48*, 9721; (b) X.-B. Hu, Z. Chen, L. Chen, L. Zhang, J.-L. Hou and Z.-T. Li *Chem. Commun.*, **2012**, *48*, 10999; (c) Y. Ma, X. Chi, X. Yan, J. Liu, Y. Yao, W. Chen, F. Huang, and J.-L. Hou, *Org. Lett.*, **2012**, *14*, 1532.

[S2] (a) K. A. Connors, *Binding Constants*; Wiley: New York, **1987**. Corbin, P. S. Ph.D. Dissertation, University of Illinois at Urbana-Champaign, Urbana, IL, 1999; (b) R. P. Ashton, R. Ballardini, V. Balzani, M. Belohradsky, M. T. Gandolfi, D. Philp, L. Prodi, F. M. Raymo, M. V. Reddington, N. Spencer, J. F. Stoddart, M. Venturi, D. J. Williams, *J. Am. Chem. Soc.*, **1996**, *118*, 4931; (c) Y. Inoue, K. Yamamoto, T. Wada, S. Everitt, X.-M. Gao, Z.-J. Hou, L.-H. Tong, S.-K. Jiang, H.-M. Wu, *J. Chem. Soc., Perkin Trans. 2*, **1998**, 1807.
